# Supplementary material for: [18F]DPA-714: Direct Comparison with [11C]PK11195 in a Model of Cerebral Ischemia in Rats
Source: PubMed Central journal article supplement (PMC3572061; doi:10.1371/journal.pone.0056441), 2013-02-13

# Immunohistochemistry

Merged

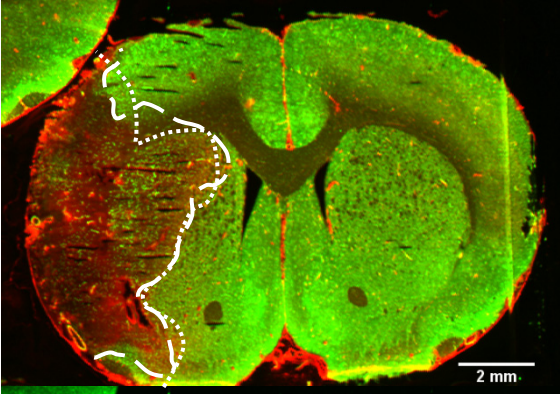

Claudin-5

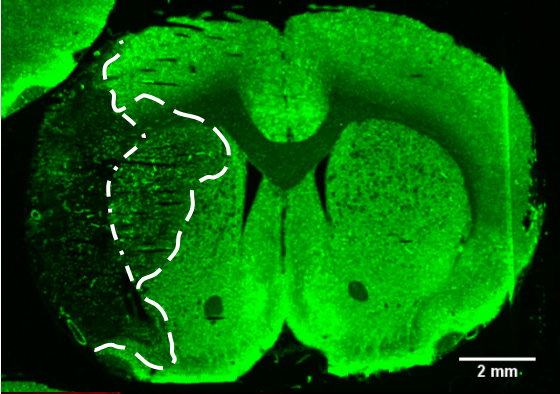

IgG

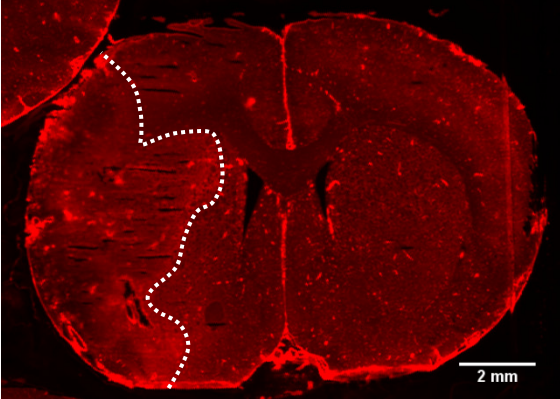

# PET imaging

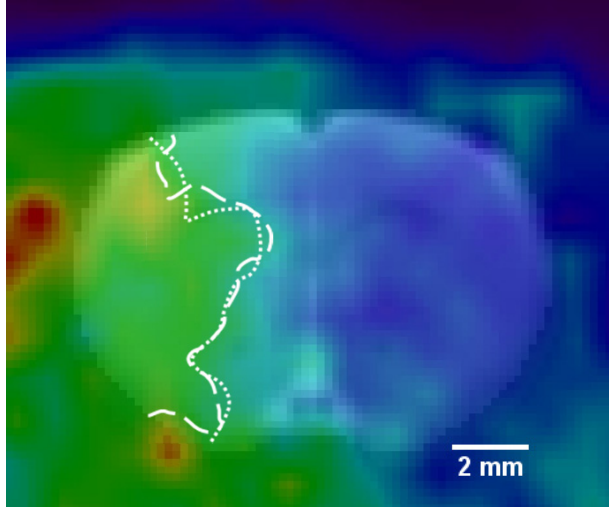

[<sup>11</sup>C]PK11195

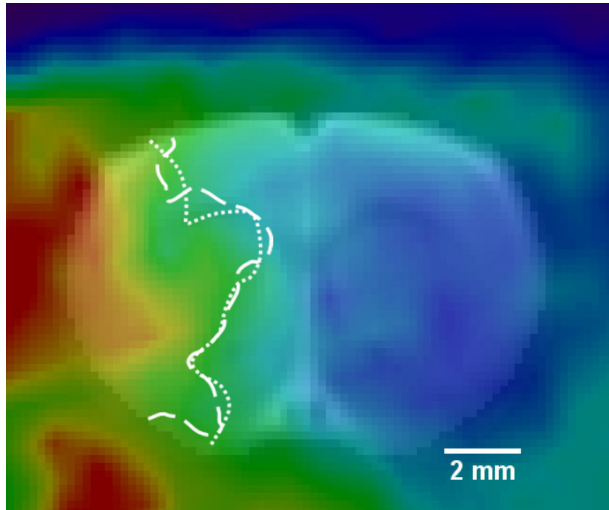

[<sup>18</sup>F]DPA-714

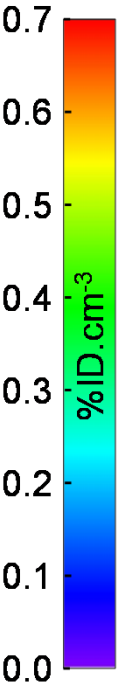

Supplement: pone.0056441.s001.pdf [file pone.0056441.s001.pdf]
