# Supplementary material for: [18F]DPA-714: Direct Comparison with [11C]PK11195 in a Model of Cerebral Ischemia in Rats
Source: PubMed Central journal article supplement (PMC3572061; doi:10.1371/journal.pone.0056441), 2013-02-13

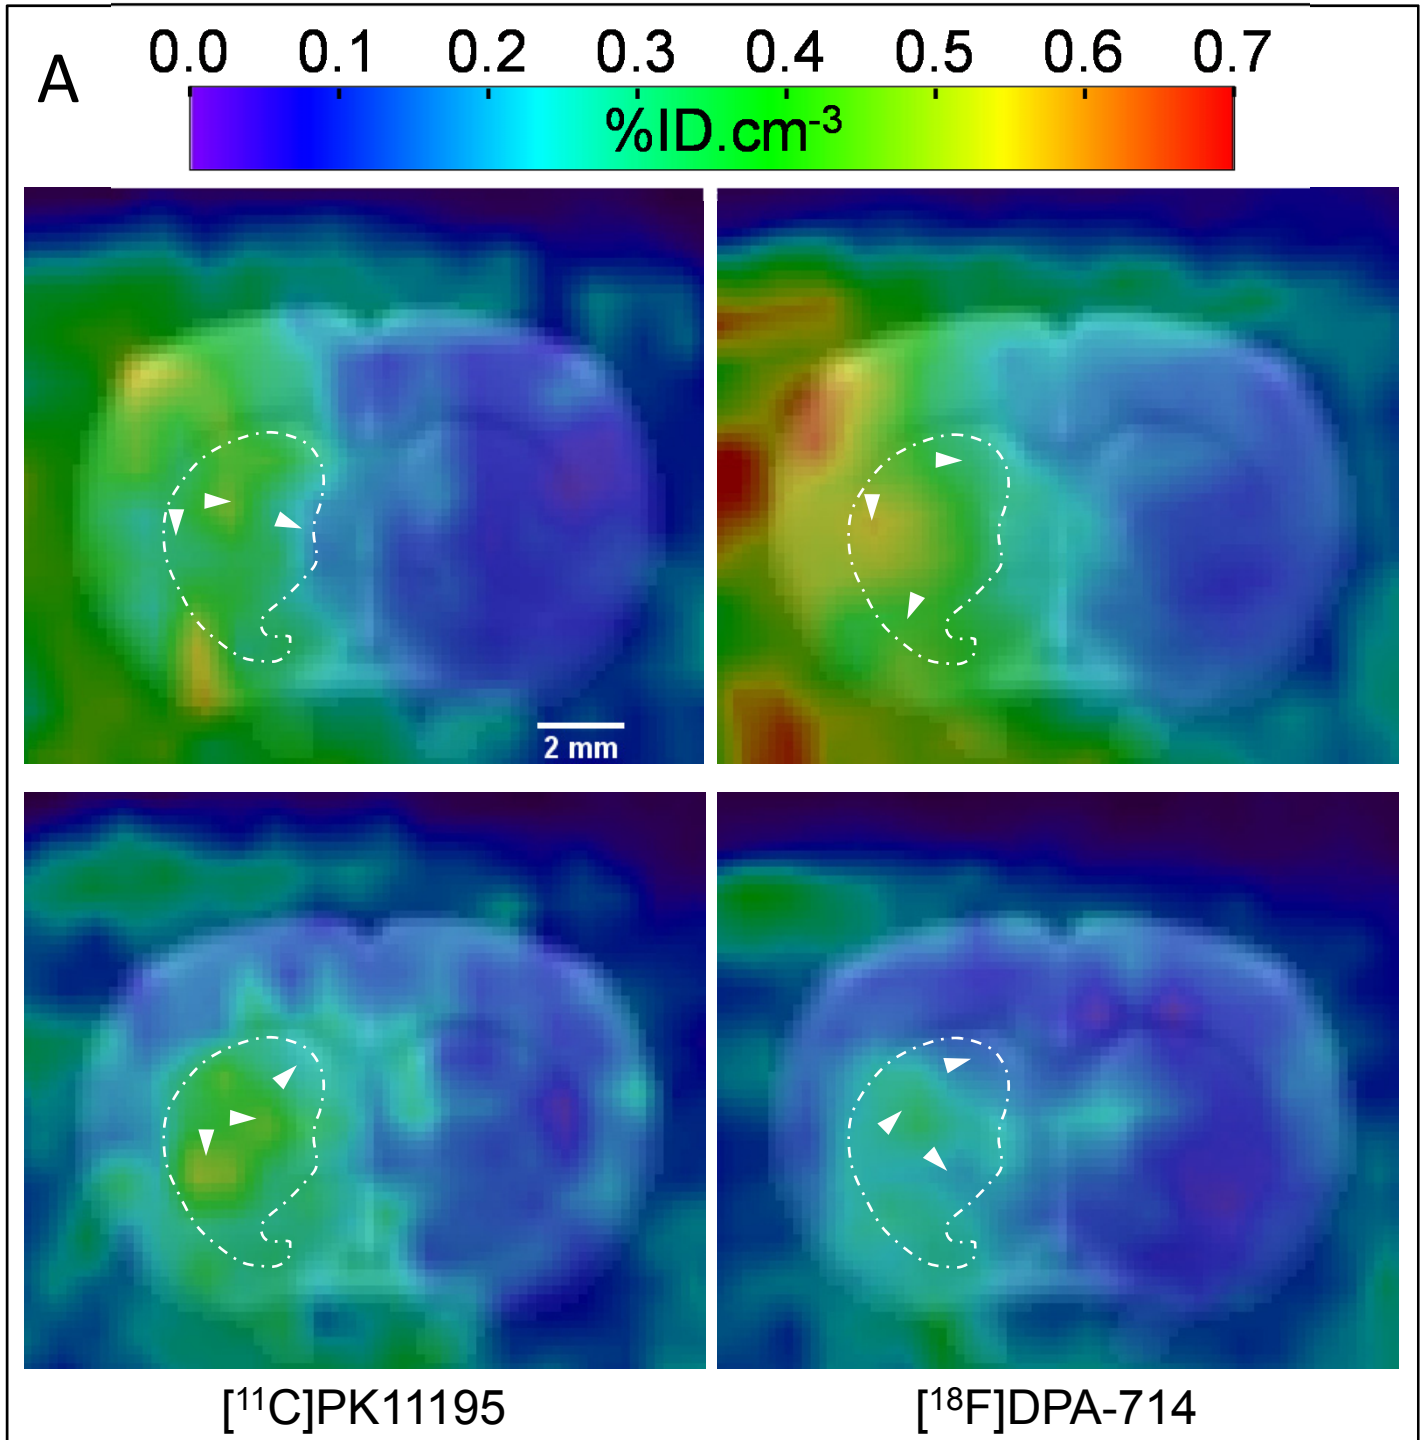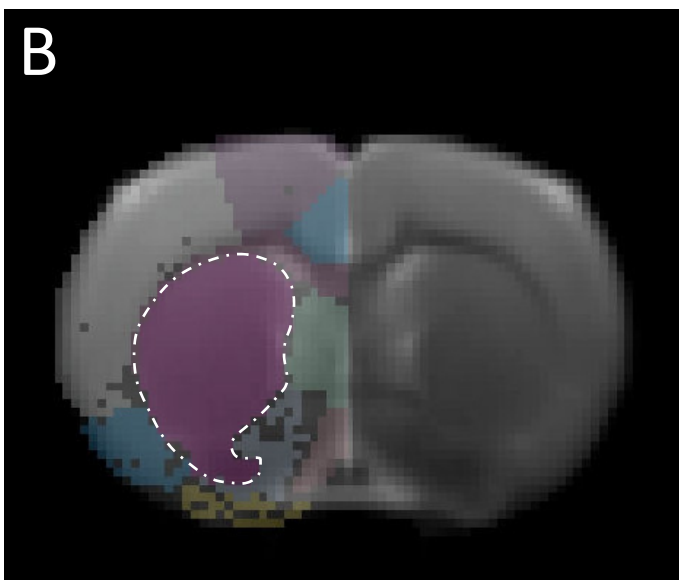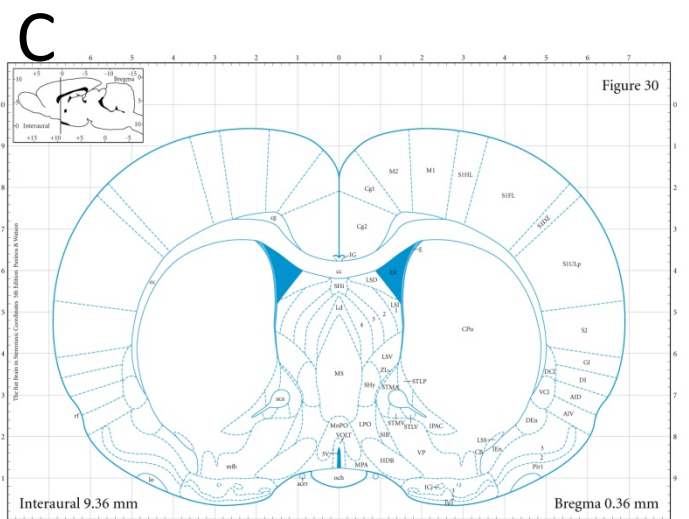

Supplement: pone.0056441.s002.pdf [file pone.0056441.s002.pdf]
